# Supplementary material for: OH End-Capped Silicone as an Effective Nucleating Agent for Polylactide—A Robotizing Method for Evaluating the Mechanical Characteristics of PLA/Silicone Blends
Source: MDPI journal article supplement (doi:10.3390/polym16081142), 2024-04-18
Supplement: s1 [file s1]

# OH End-Capped Silicone as an Effective Nucleating Agent for Polylactide—A Robotizing Method for Evaluating the Mechanical Characteristics of PLA/Silicone Blends

Robert E. Przekop <sup>1</sup>, Bogna Sztorch <sup>1,\*</sup>, Julia Głowacka <sup>1,2</sup>, Agnieszka Martyla <sup>1</sup>, Eliza Romańczuk-Ruszek <sup>3</sup>, Marek Jałbrzykowski <sup>4</sup> and Łukasz Derpeński <sup>4,\*</sup>

<sup>1</sup> Centre for Advanced Technologies, Adam Mickiewicz University in Poznań, 10 Uniwersytetu Poznańskiego, 61-614 Poznań, Poland; rprzekop@amu.edu.pl (R.E.P.); julia.glowacka@amu.edu.pl (J.G.); agnieszka.martyla@amu.edu.pl (A.M.)

<sup>2</sup> Faculty of Chemistry, Adam Mickiewicz University in Poznań, 8 Uniwersytetu Poznańskiego, 61-614 Poznań, Poland

<sup>3</sup> Institute of Biomedical Engineering, Faculty of Mechanical Engineering, Białystok University of Technology, Wiejska 45C Street, 15-351 Białystok, Poland; e.romanczuk@pb.edu.pl

<sup>4</sup> Institute of Mechanical Engineering, Faculty of Mechanical Engineering, Białystok University of Technology, Wiejska 45C Street, 15-351 Białystok, Poland; m.jalbrzykowski@pb.edu.pl

\* Correspondence: bogna.sztorch@amu.edu.pl (B.S.); l.derpenki@pb.edu.pl (Ł.D.)

## 1. Figures

|                     |   |
|---------------------|---|
| 1.1. Figure S1..... | 2 |
| 1.2. Figure S2..... | 3 |
| 1.3. Figure S3..... | 7 |
| 1.4. Figure S4..... | 8 |
| 1.5. Figure S5..... | 9 |

## 2. Tables

|                    |   |
|--------------------|---|
| 2.1. Table S1..... | 9 |
|--------------------|---|

# 1. Figures

## 1.1. Figure S1

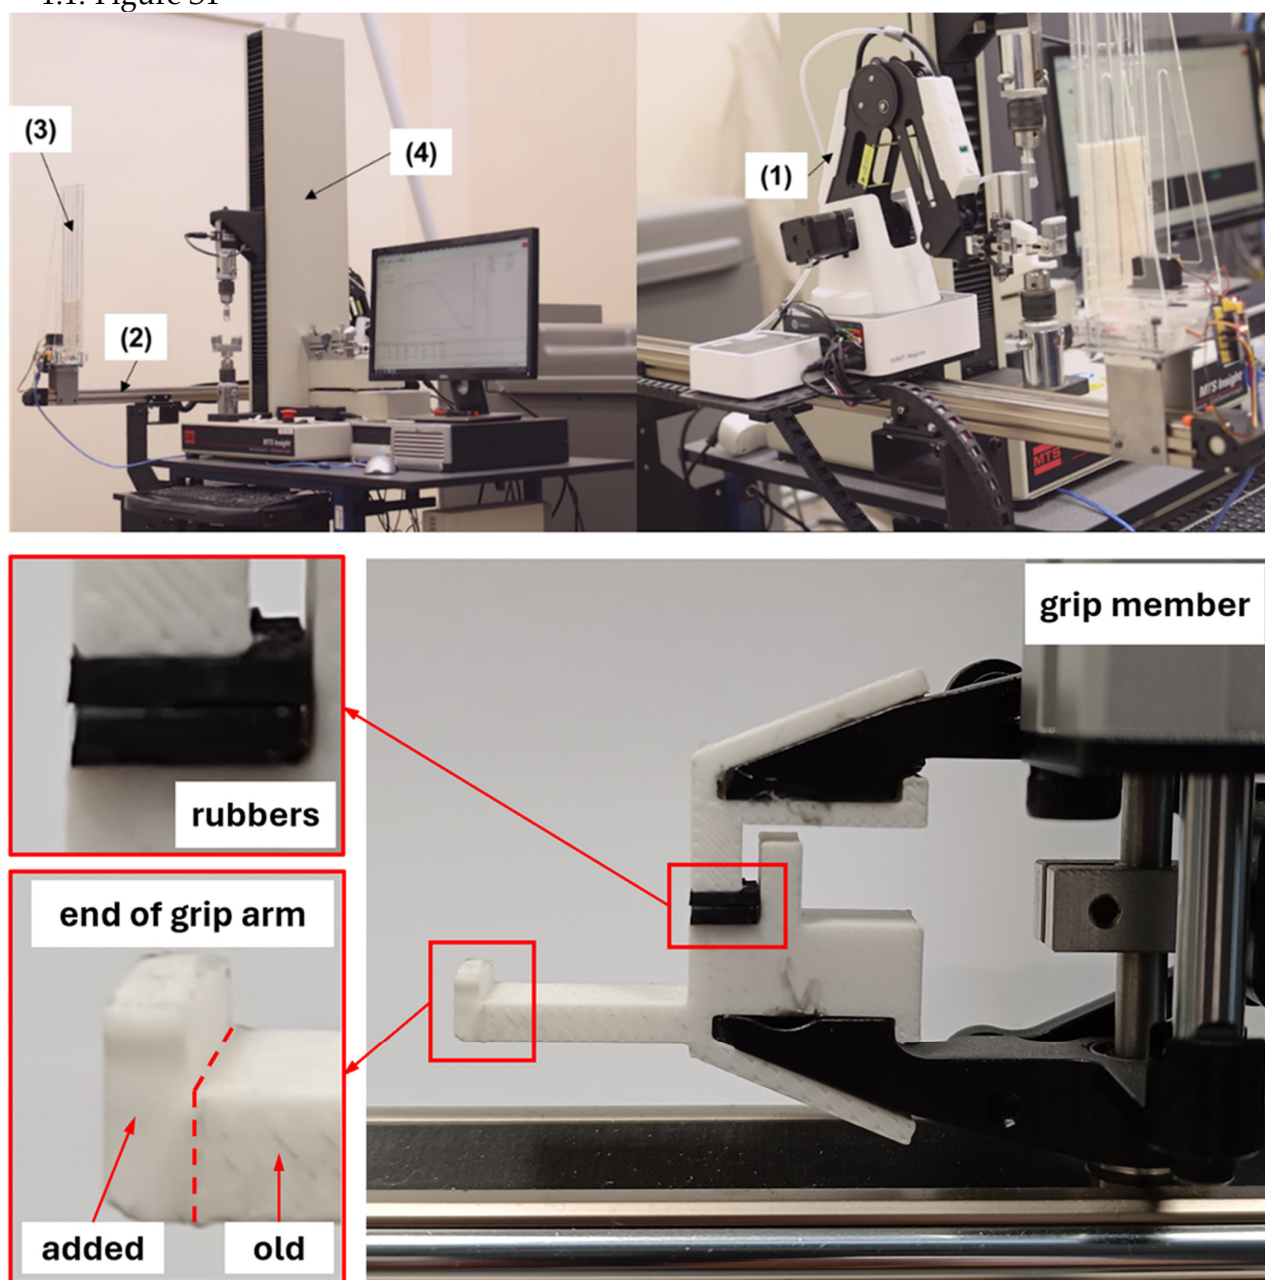

**Figure S1.** High-throughput experimentation station: Dobot Magician manipulator (1), linear slide (2), sample magazine (3), and MTS Insight testing machine (4).

1.2. Figure S2

(A)

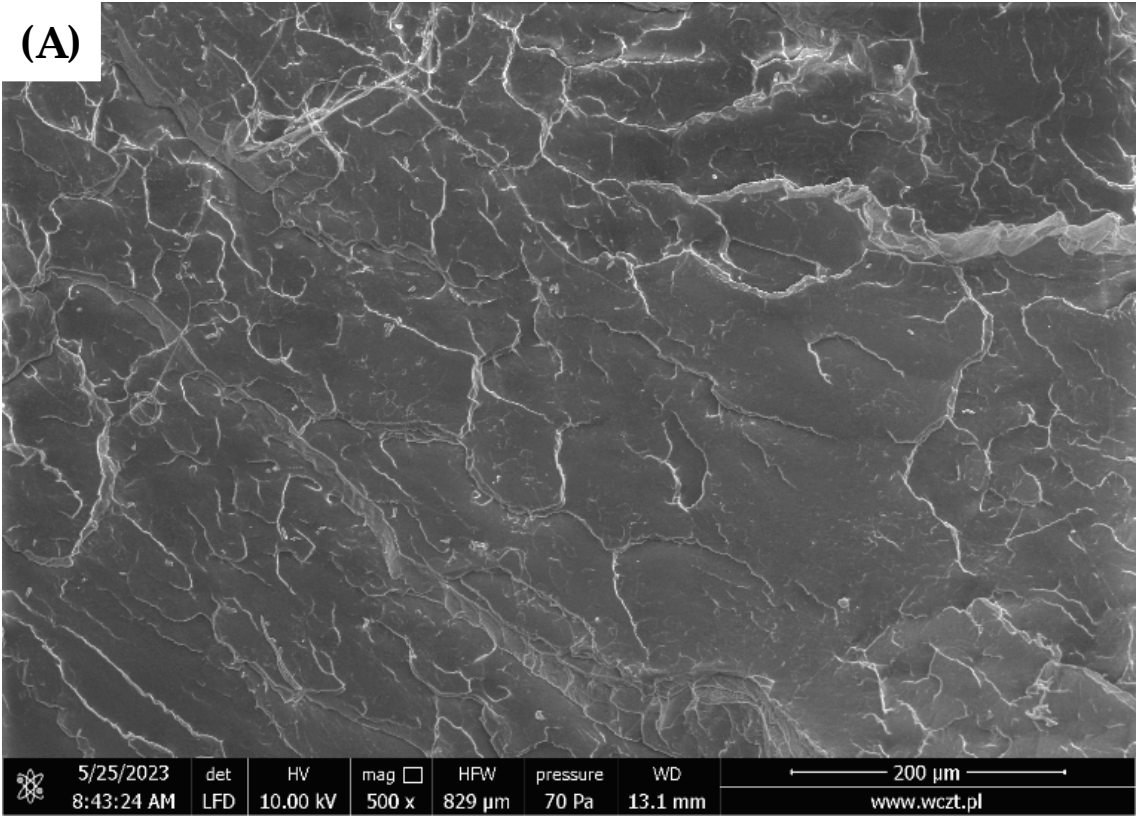

(B)

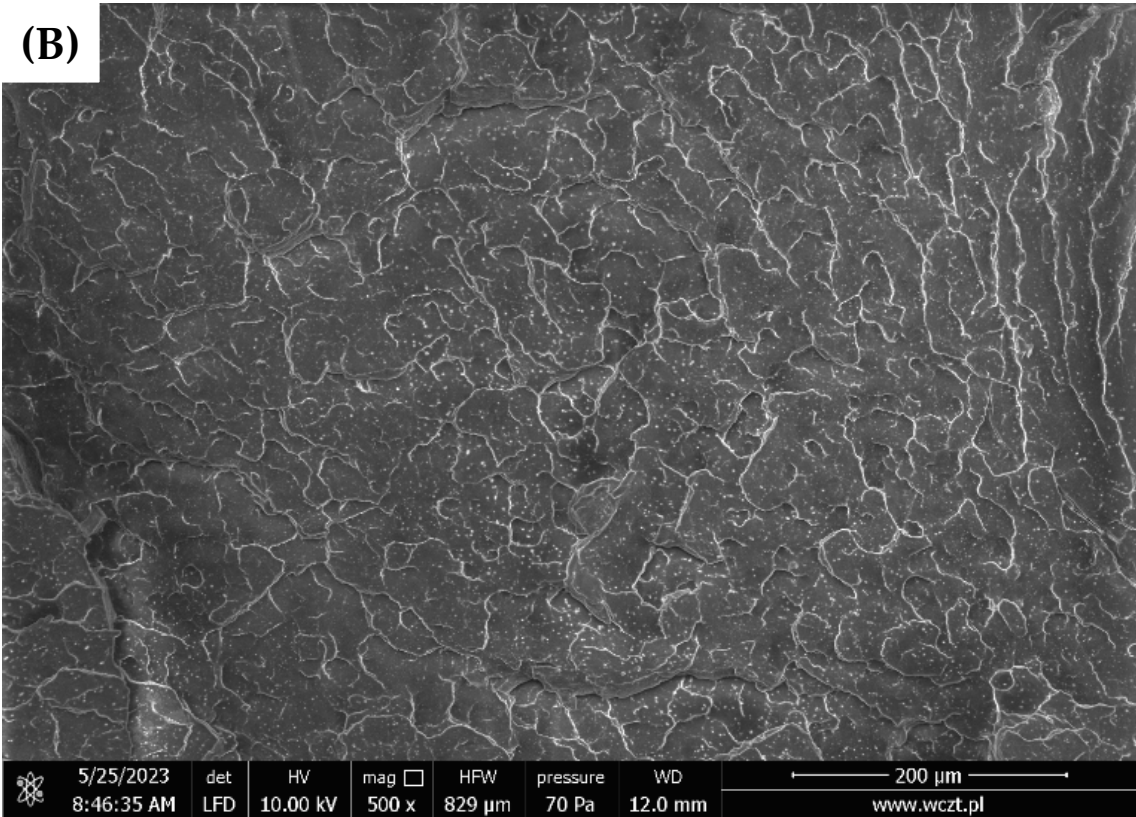

(C)

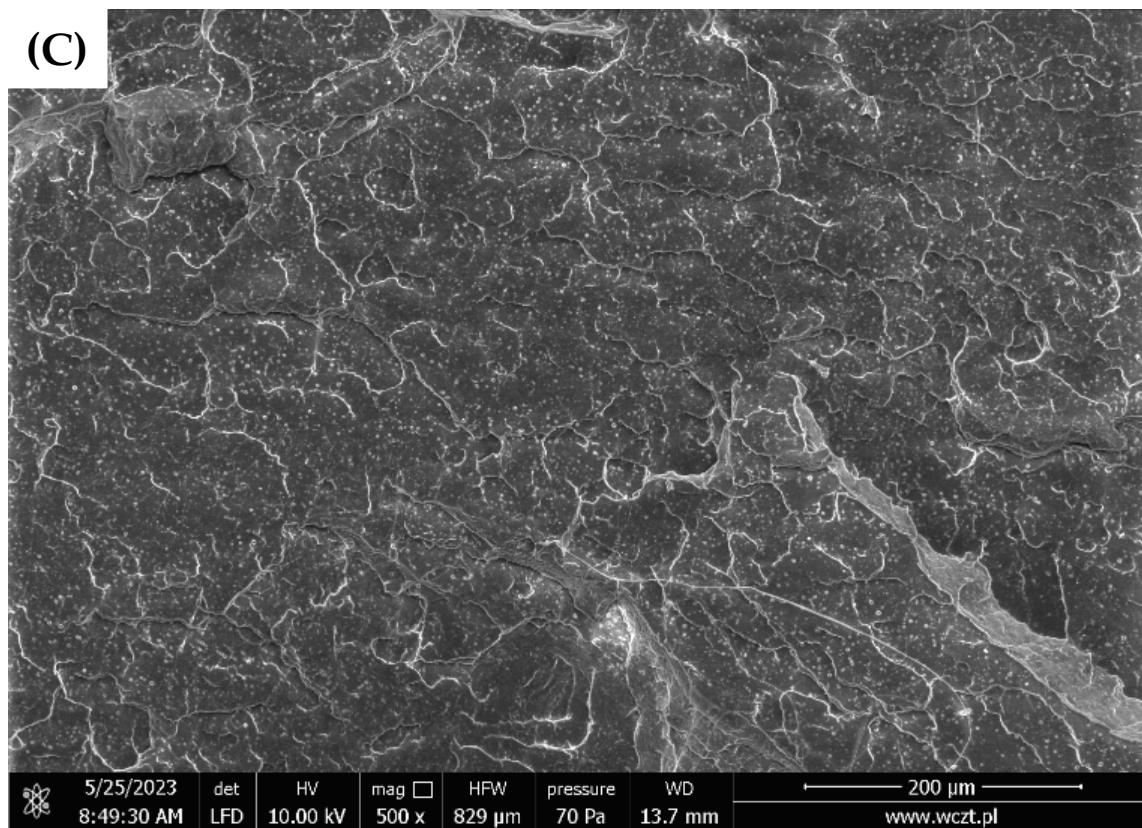

(D)

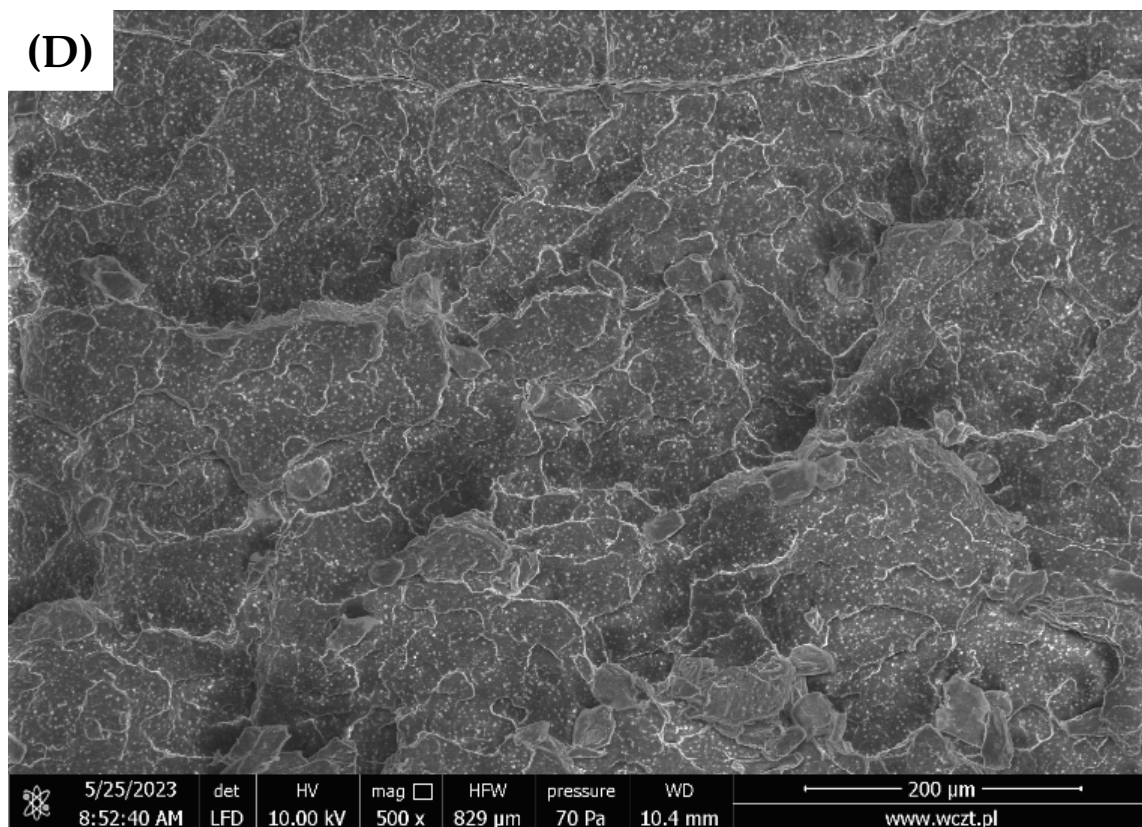



(E)

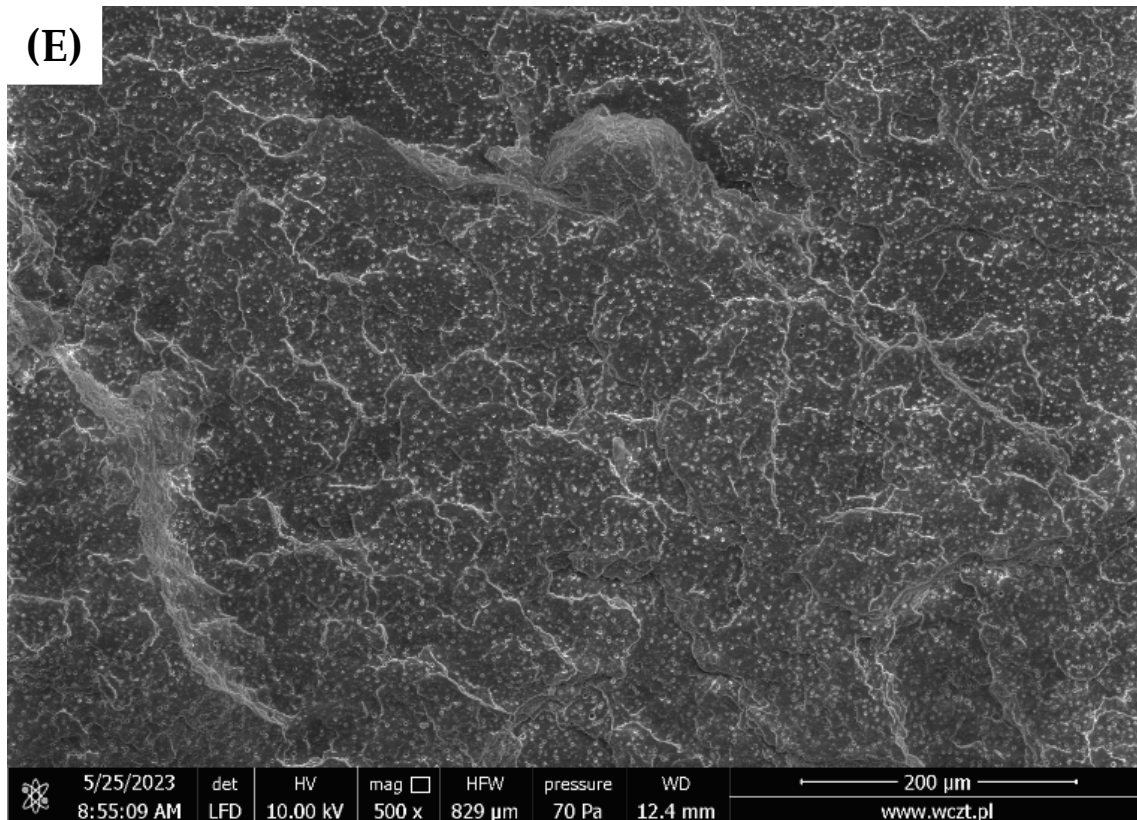

(F)

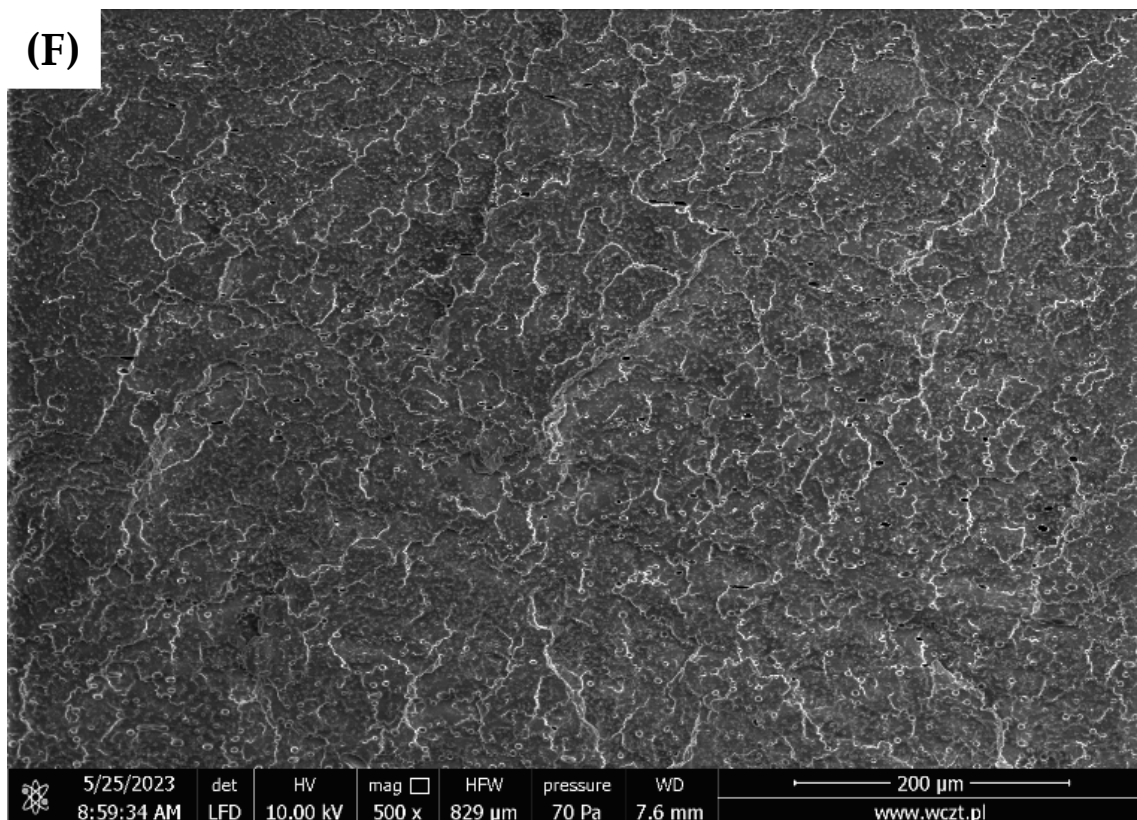

(G)

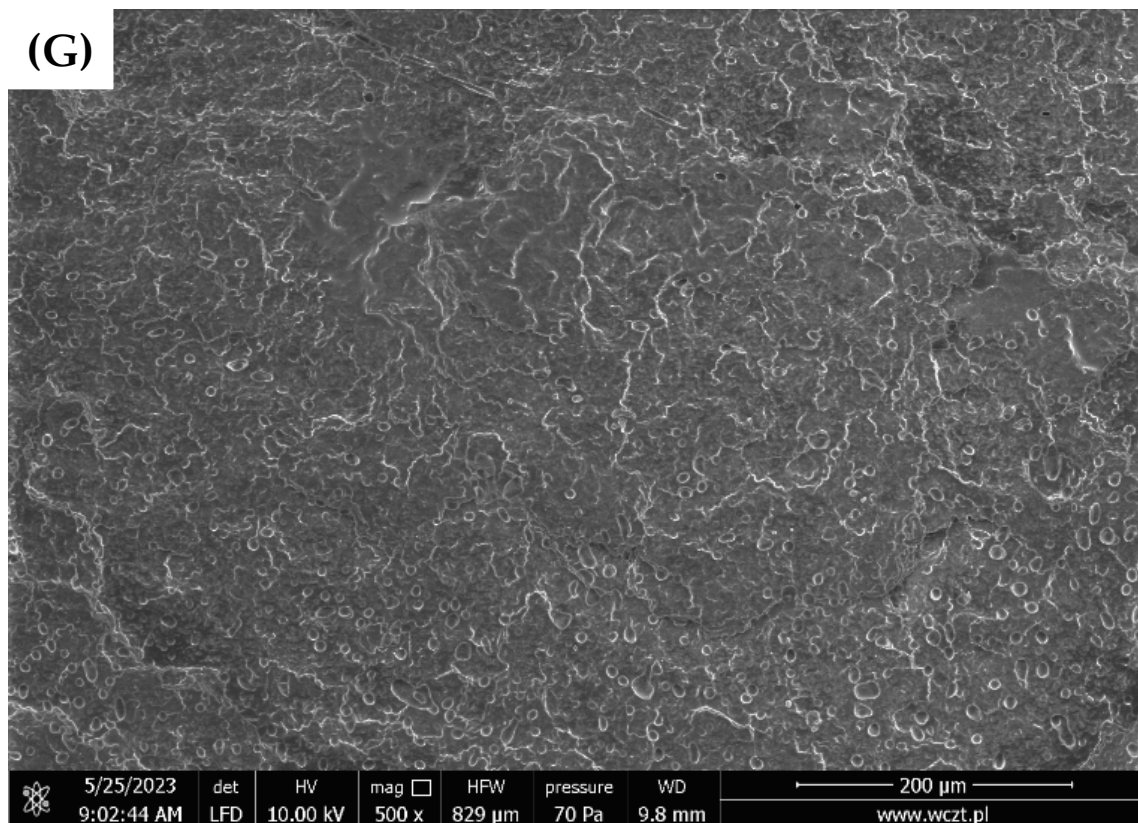

**Figure S2.** SEM images PLA (A), 0.5%OH20k (B), 1.0%OH20k (C), 2.5%OH20k (D), 5%OH20k (E), 10%OH20k (F), 15%OH20k (G).



1.3. Figure S3

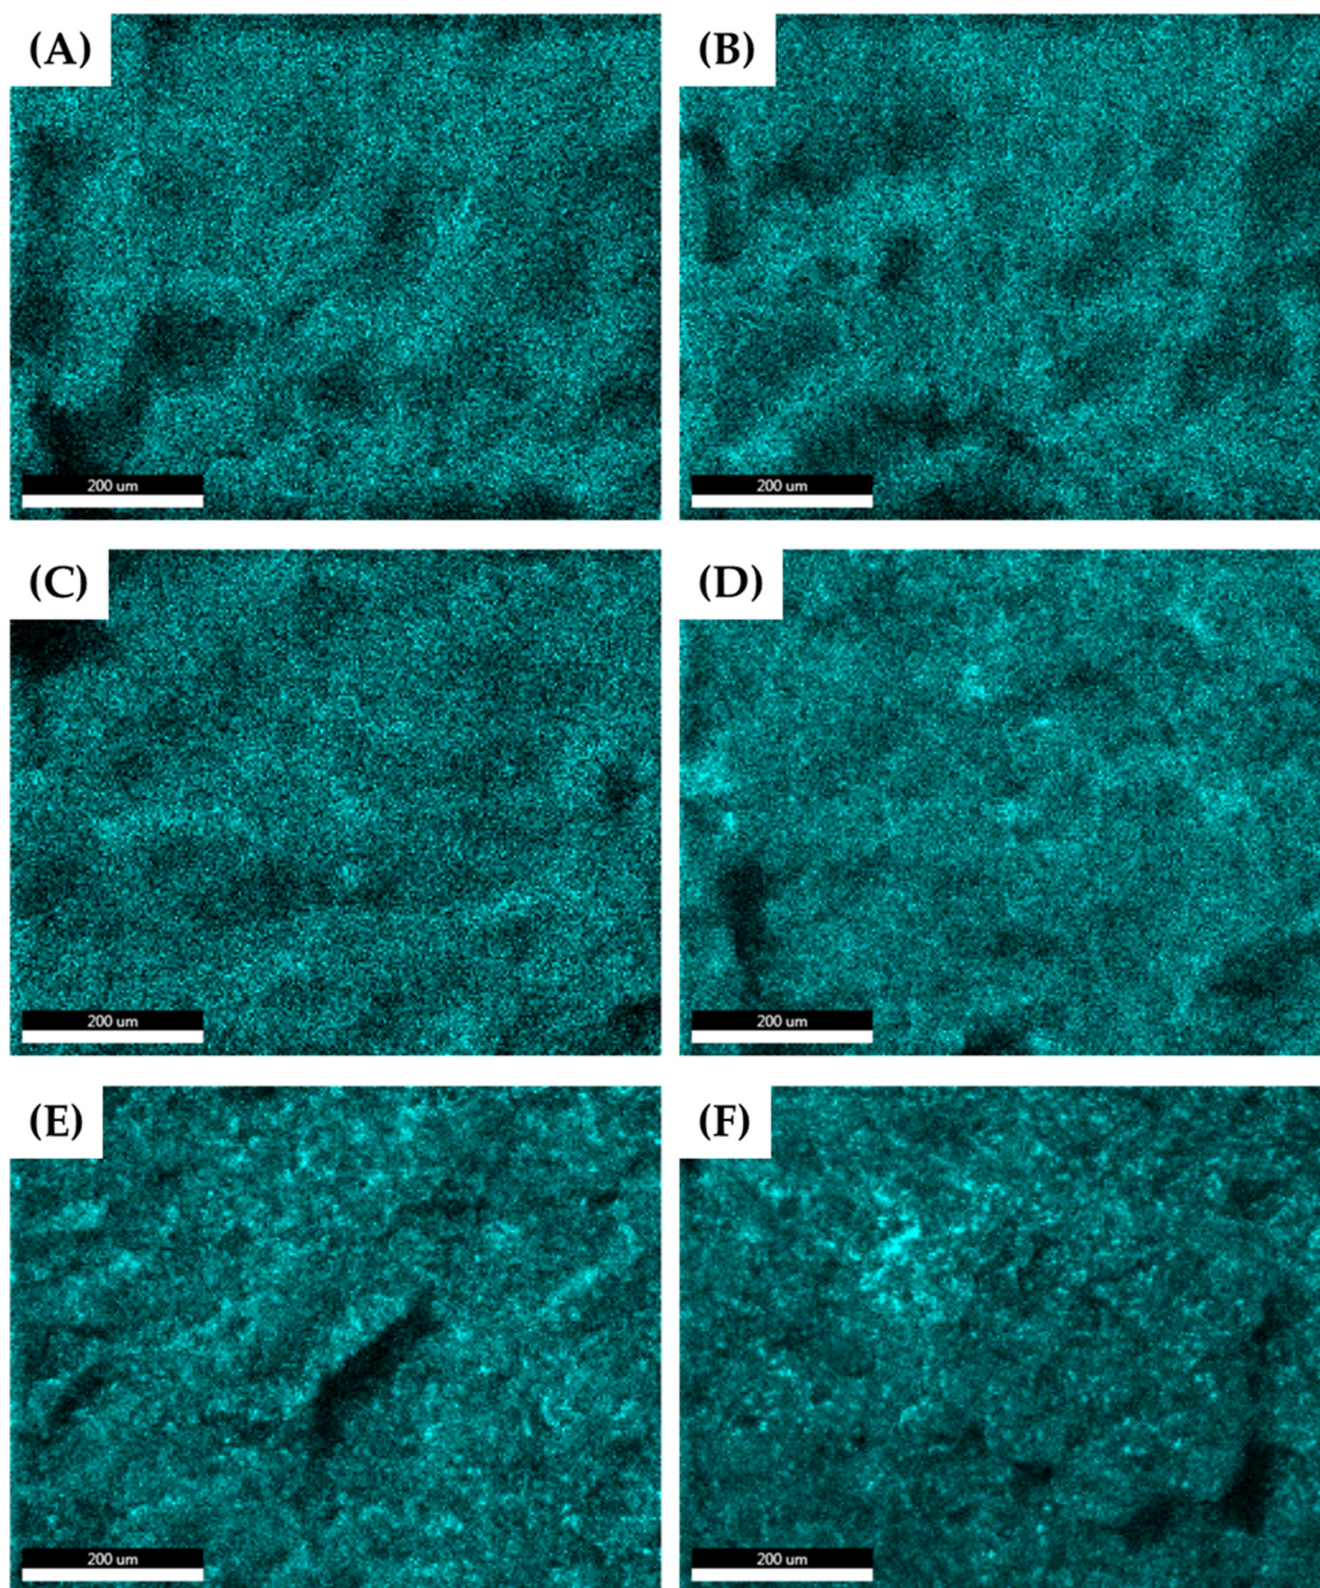

**Figure S3.** Si (silicon) distribution on the surface of PLA/OH20k blends breakthroughs made in liquid nitrogen. 0.5%OH20k (A), 1.0%OH20k (B), 2.5%OH20k (C), 5%OH20k (D), 10%OH20k (E), 15%OH20k (F).

1.4. Figure S4

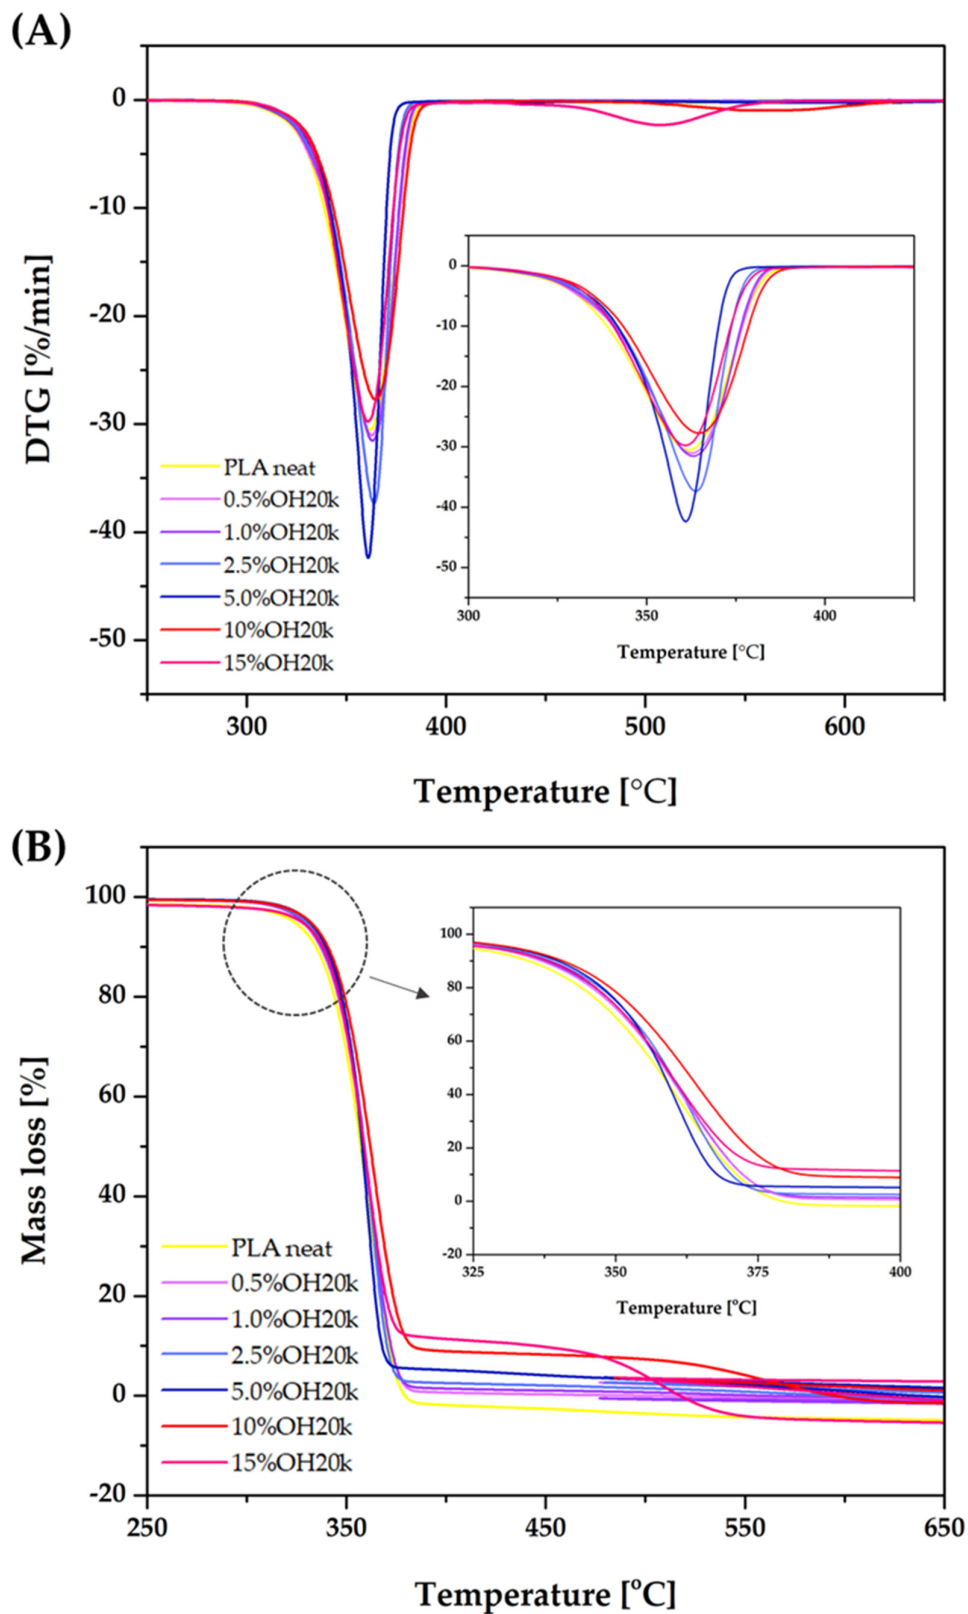

**Figure S4.** The effects of silicone content on the thermal decomposition of PLA and PLA/silicone blends: DTG (A), TGA (B) – N<sub>2</sub> atmosphere.



## 1.5. Figure S5

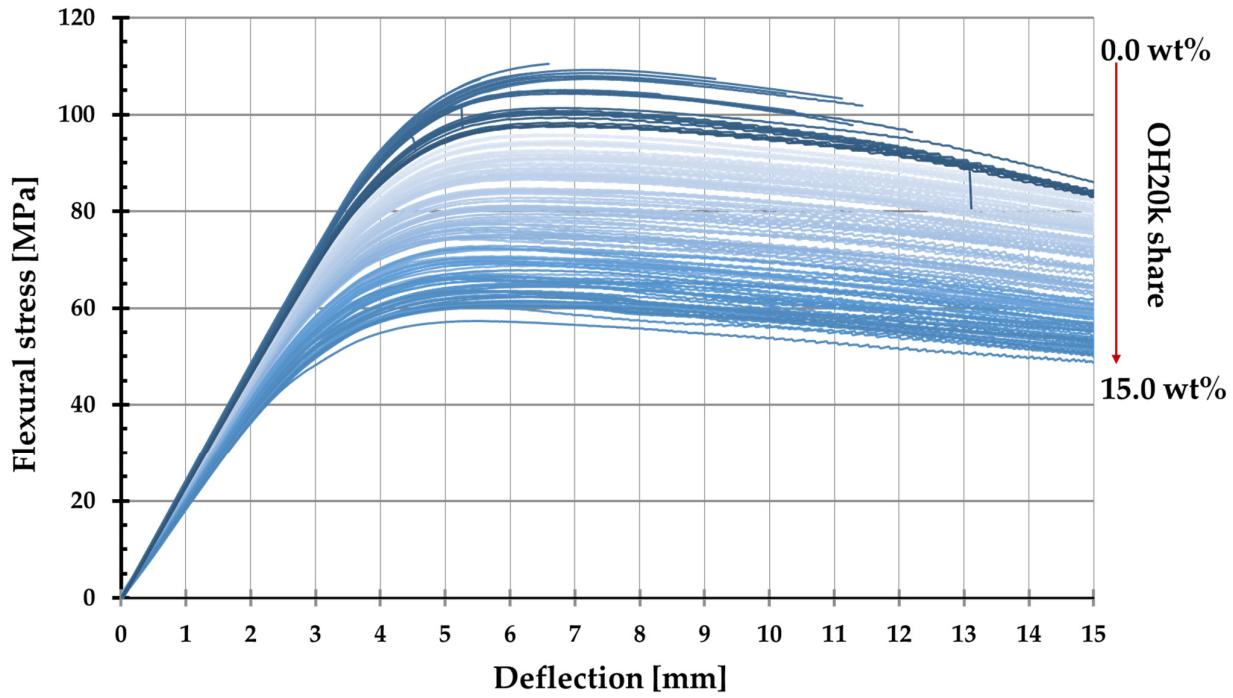

**Figure S5.** Stress-deflection behavior of PLA and its blends as a function of silicone content (0-15%) derived from automatic test station.

## 2. Tables

### 2.1. Table S1

**Table S1.** Injection molding parameters.

| Temperature (°C)      | Nozzle                    | Zone 3           | Zone 2 | Zone 1              | Feed |
|-----------------------|---------------------------|------------------|--------|---------------------|------|
|                       | 200                       | 195              | 195    | 190                 | 40   |
| Mold temperature (°C) | 25                        |                  |        |                     |      |
| Holding pressure      | t (s)                     | 0                |        | 11                  |      |
|                       | p (bar)                   | 700              |        | 1100                |      |
| Clamping force (kN)   | Holding pressure time (s) | Cooling time (s) |        | Screw diameter (mm) |      |
| 800                   | 11                        | 50               |        | 25                  |      |
